# Supplementary material
Source: PubMed Central journal article supplement (PMC4399033)
Supplement: IAI.02756-14_zii999091222so1.pdf [file IAI.02756-14_zii999091222so1.pdf]

**Table S1. Oligonucleotide primers used for construction of pOMPP4 ( $\Delta$ OMPDC), pNUPP3 ( $\Delta$ up), and pgUPROMP ( $\Delta$ uprt::OMPDC) KO vectors**

| Primer   | Sequence                                                            | Primer Use                        | Construct            | Corresponding TGME49 locus KO                    |
|----------|---------------------------------------------------------------------|-----------------------------------|----------------------|--------------------------------------------------|
| PMiniHXF | GATAAGCTTGATCAGCACGAAACCTTG                                         | HXGPRT cassette forward primer    | HXGPRT mini cassette |                                                  |
| PMiniHXR | CCGCTCTAGAACTAGTGGATCCC                                             | HXGPRT cassette reverse primer    |                      |                                                  |
| OMF1     | GTAACGCCAGGGTTTTCCAGTCACGACGACTAGT <b>GCCGTAGTGTACCCGATGATGC</b>    | Pru OMPDC KO 5' forward primer    | pRS416.pOMPP4        | TGME49_259690 chrVIIb 2,709,536 to 2,712,859 (-) |
| OMR1     | GTTTGAATGCAAGGTTTCGTGCTGATCAAGTTTAAACGAATAGCAGTGTGGACACGTGCA        | Pru OMPDC KO 5' reverse primer    |                      |                                                  |
| OMF2     | CAGTGACACCGCGGTGGAGGGGGATCCACGTTTAAAC <b>CCGATGACGGCGAAGTTGACTG</b> | Pru OMPDC KO 3' forward primer    |                      |                                                  |
| OMR2     | GCGGATAACAATTTACACAGGAAACAGCGCGGCCGCGGTGACGAATAGTCTTCGCTGCA         | Pru OMPDC KO 3' reverse primer    |                      |                                                  |
| NUPF1    | GTAACGCCAGGGTTTTCCAGTCACGACGACTAGT <b>GCGAAACCTGAACTGAGTGGCGG</b>   | Pru UP KO 5' forward primer       | pRS416.pNUPP3        | TGME49_310640 chrXI 1,500,995 to 1,497,792 (+)   |
| NUPR1    | GTTTGAATGCAAGGTTTCGTGCTGATCAAGCTAGCGTGACACAAGTGCACCTCGCTG           | Pru UP KO 5' reverse primer       |                      |                                                  |
| UPF2     | CAGTGACACCGCGGTGGAGGGGGATCCACGCTAGCAGTCTGGAGATGGAGACGCACC           | Pru UP KO 3' forward primer       |                      |                                                  |
| UPR2     | GCGGATAACAATTTACACAGGAAACAGCGGCCGCGAGACGTCAGTTTCCAGTGC              | Pru UP KO 3' reverse prime        |                      |                                                  |
| UPRPF1   | TTGGGTAACGCCAGGGTTTTCCAGTCACGACGGTTTAAACGTGAGCTCATGCTGGAGCTTCG      | Pru UPRT KO 5' forward Primer     | pRS416.pgUPROMP      | TGME49_312480 chrXI 2,718,655 to 2,722,697 (+)   |
| UPRPF1   | AGCTTCCGCTCGCTGGAC                                                  | Pru UPRT KO 5' reverse primer     |                      |                                                  |
| UPRPF2   | GCCCTGCTGTCTTGTGAGTACT                                              | Pru UPRT KO 3' forward primer     |                      |                                                  |
| UPRPF2   | GTGAGCGGATAACAATTTACACAGGAAACAGCGCGGCCGCTGGCGTTTCGATCGACCGAAG       | Pru UPRT KO 3' reverse primer     |                      |                                                  |
| OMP5'A2F | CCTTTTTTCGTGGACCTGTCCACAGGGCTTCTAAAGGAAGGGGGTGTACATGTGTGTC          | Pru OMPDC cassette forward primer |                      | TGME49_259690 chrVIIb 2,709,205 to 2,712,430 (-) |
| OMPGR3   | GATTCGTCAGCGGTCTGTCAAAAAAAGTAGAGACCTCAGCTTTCCTCGTACTGCTGGAC         | Pru OMPDC cassette reverse primer |                      |                                                  |

\*Italicised nucleotides indicate regions of crossover in yeast recombination cloning, underlined nucleotides indicate restriction enzyme sites, and bold nucleotides indicate specific priming target regions (ToxoDB, version 12.0 ).

**Table S2. Oligonucleotide Primers used for Validation of  $\Delta$ OMPDC and  $\Delta$ UP Genomic Deletions**

| Primer   | Sequence                  |
|----------|---------------------------|
| 5'DHFRXF | ACTGCGAACAGCAGCAAGATCG    |
| 3'DHFRXR | GTTGGCCTACGTGACTTGCTGATG  |
| OMCXF    | CAGCAGAGCAATACGGAGGCTGT   |
| OMDF     | CTGTACGCGCCTTACCAAGACC    |
| OMDR     | GATACGACAGAAACGGTCGAACTGC |

|                |                            |
|----------------|----------------------------|
| <b>OMCXR</b>   | CACTCGCTAAAACAGCAACGGTTGAC |
| <b>CLOMF</b>   | CTACCAGCAGTCGTCGGTGGA      |
| <b>OMXEXR</b>  | CTTCCGAGGTATTACAGCAGCC     |
| <b>OMXEXF</b>  | TCTCTGCAAGGACGGCAAAGGG     |
| <b>NUPCXF</b>  | ATCCTGGAGTGACACTGGAGTCTC   |
| <b>NUPDF</b>   | GAGAACCCTTGGCCGTCGTTC      |
| <b>NUPDR</b>   | GCAGAGCACATGAACGACCAAGC    |
| <b>NUPCXR</b>  | CTATCCACATCTGAAACCCGCTGA   |
| <b>UPRTCXF</b> | TCTCTCCCTGAGCTGCACGTG      |
| <b>UPRTDF</b>  | TGACGTCGGGTGCCTACGTTC      |
| <b>UPRTDR</b>  | CGACAGCTGCACTCGAAGACAC     |
| <b>UPRTCXR</b> | CCAGGTTGCACTGGTCAGATG      |
